# Supplementary material for: The circadian clock gene bmal1 is necessary for co-ordinated circatidal rhythms in the marine isopod Eurydice pulchra (Leach)
Source: PLOS journal article supplement (doi:10.1371/journal.pgen.1011011), 2023-10-19

## S2 Fig. Preliminary dsRNAi knockdown experiments for *EpClk*, *Epbmal1* and *Epcry2*

A, B. Two experiments attempting to knockdown *EpClk*. qPCR performed up to 6 days after injection. No consistent long-lasting knockdown was achieved. Means  $\pm$  ratio error was calculated using Roche LightCycler software

C, D. Two experiments using two different sequences of *Epbmal1* (F1 and F2) show significant knockdown from days 4-9.

E. Knockdown of *Epbmal1* (F1 sequence) and *Epcry2* shows significant knockdown at days 3 and 4 after injection (see also Fig 2A-D). Data from combining separate experiments on *Epbmal1F1* and *Epcry2* knockdown by setting YFP values to 100%.

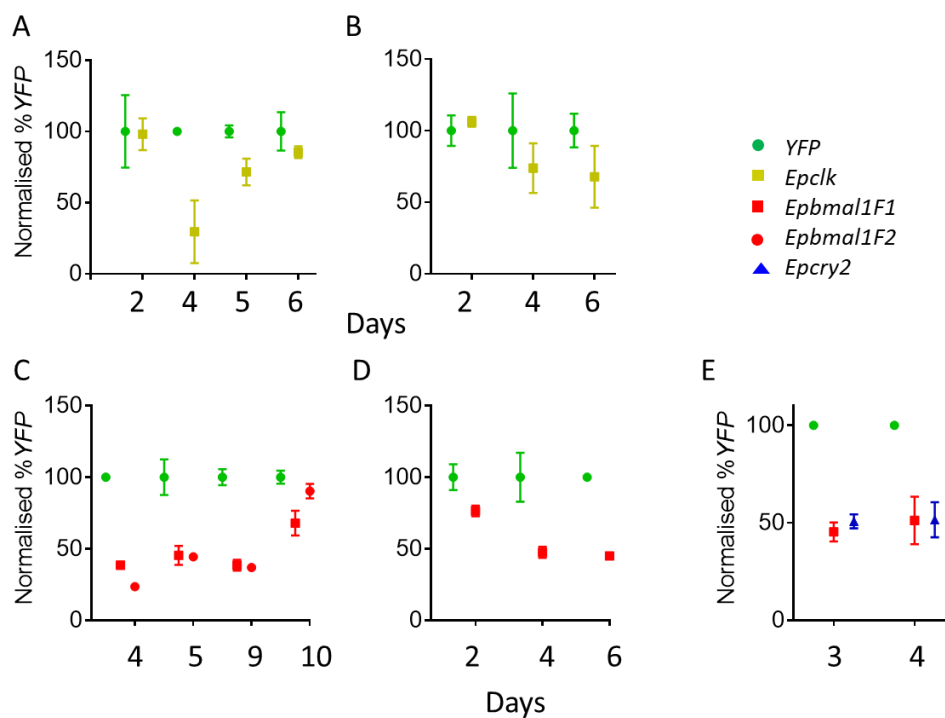

Supplement: S2 (10.1371/journal.pgen.1011011.s002) [file journal.pgen.1011011.s002]
